# Supplementary material for: The Mutation in wbaP cps Gene Cluster Selected by Phage-Borne Depolymerase Abolishes Capsule Production and Diminishes the Virulence of Klebsiella pneumoniae
Source: MDPI journal article supplement (doi:10.3390/ijms222111562), 2021-10-26
Supplement: s1 [file s1]

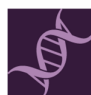

## Supplementary data

**Table S1.** Genetic changes present in the *K. pneumoniae* 7De mutant. No mutations were detected in the strain's plasmids.

| Position in the bacterial chromosome | Reference nucleotide | Alteration nucleotide | Type of mutation               | Gene              | Product                                                  |
|--------------------------------------|----------------------|-----------------------|--------------------------------|-------------------|----------------------------------------------------------|
| 1729903                              | AT                   | C                     | frameshift variant, start lost | <i>wbaP</i>       | undecaprenyl-phosphate galactose phosphotransferase WbaP |
| 2437981                              | G                    | C                     | synonymous variant             | <i>ydjP_2</i>     | putative protease YdjP                                   |
| 2797478                              | A                    | G                     | -                              | intergenic region | possible promoter of putative L-galactonate transporter  |
| 3080156                              | G                    | A                     | synonymous variant             | <i>sapA</i>       | peptide transport periplasmic protein SapA               |
| 3095136                              | C                    | A                     | synonymous variant             | hypothetical gene | putative kinase                                          |
| 5018734                              | G                    | A                     | -                              | intergenic region | -                                                        |

**Table S2.** <sup>1</sup>H and <sup>13</sup>C NMR chemical shifts and inter-residue connectivities of the O-specific polysaccharides from *K. pneumoniae* Kp486 (O1v1).

| Residue                     | Atom chemical shift (ppm) |       |       |       |       | Connectivities to           |                               | Inter-Residue Atoms/Residues |
|-----------------------------|---------------------------|-------|-------|-------|-------|-----------------------------|-------------------------------|------------------------------|
|                             | H1/C1                     | H2/C2 | H3/C3 | H4/C4 | H5/C5 | H6,6'/C6 (CH <sub>3</sub> ) | δ <sub>H</sub> δ <sub>C</sub> |                              |
| <b>A</b> →3)-β-D-Galp-(1→   | 5.22                      | 4.35  | 4.09  | 4.31  | 3.86  | 3.69                        | 3.92 77.7                     | H-3, C-3 of <b>C</b>         |
|                             | 110.5                     | 81.4  | 85.3  | 80.5  | 71.0  | 63.8                        |                               |                              |
| <b>B</b> →3)-α-D-Galp-(1→   | 5.19                      | 4.05  | 4.16  | 4.29  | 4.24  | 3.76                        | 4.15 80.0                     | H-3, C-3 of <b>E</b>         |
|                             | 95.8                      | 68.1  | 80.0  | 70.0  | 71.3  | 61.9                        |                               |                              |
| <b>C</b> →3,4)-α-D-Galp-(1→ | 5.10                      | 4.10  | 3.92  | 4.18  | 4.24  | 3.79                        | 4.09 85.3                     | H-3, C-3 of <b>A</b>         |
|                             | 100.8                     | 68.7  | 77.7  | 79.1  | 71.4  | 60.9                        |                               |                              |
| <b>D</b> →D-Galp-(1→        | 5.01                      | 3.83  | 3.92  | 4.07  | 4.24  | 3.79                        | 4.18 79.1                     | H-4, C-4 of <b>C</b>         |
|                             | 101.2                     | 69.9  | 70.0  | 69.5  | 71.4  | 60.9                        |                               |                              |
| <b>E</b> →3)-β-D-Galp-(1→   | 4.69                      | 3.75  | 3.81  | 4.19  | 3.68  | 3.76                        | 4.16 80.0                     | H-3, C-3 of <b>B</b>         |
|                             | 105.2                     | 70.5  | 77.7  | 65.6  | 75.6  | 61.9                        |                               |                              |

Spectra were recorded for <sup>2</sup>H<sub>2</sub>O solution at 298 K. Acetone (δ<sub>H</sub>/δ<sub>C</sub> 2.225/31.05 ppm) was used as an internal reference.

**Table S3.** Characteristics of the four *Klebsiella*-specific phages used in this study.

|                           | vB_KpnS_KP36<br>[phage KP36] | vB_KpnP_KP34<br>[phage KP34] | vB_KpnM_KP27<br>[phage KP27] | vB_KpnM_KP15<br>[phage KP15] |
|---------------------------|------------------------------|------------------------------|------------------------------|------------------------------|
| Genus                     | <i>Webervirus</i>            | <i>Drulivirus</i>            | <i>Slopekovirus</i>          | <i>Slopekovirus</i>          |
| Host strain               | Kp486                        | Kp486                        | KpATCC 700603<br>Kp767       | KpATCC 700603<br>Kp767       |
| Capsular-type specificity | K63                          | K63                          | KL53<br>KL10                 | KL53<br>KL10                 |
| GenBank accession number  | NC_029099.1                  | NC_013649.2                  | NC_020080.1                  | NC_014036.1                  |

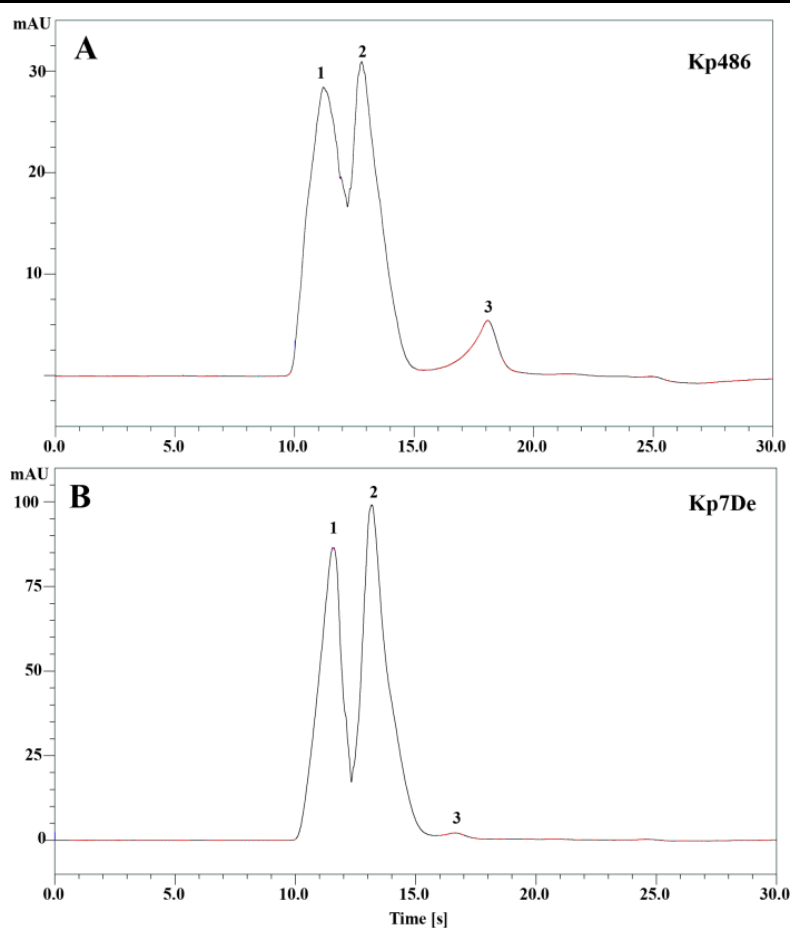**Figure S1.** Comparison of elution profiles for poly- and oligosaccharides isolated by mild acid hydrolysis of Kp486 (A) and Kp7De (B) LPS. Numbers indicate fractions (1, 2, 3). Three fractions were eluted and checked by  $^1\text{H}$  NMR spectroscopy. Fractions 1 did not contain sugar constituents, fractions 2 were identified as O-specific polysaccharide (O-PS), and fractions 3 as unsubstituted core oligosaccharides of LPS.
